# Supplementary material for: Cation- and anion-ordered rutile-type derivative LiTeO3(OH)
Source: Royal Society of Chemistry journal article supplement (doi:10.1039/d0cc04074f), 2020-01-01
Supplement: d0cc04074f1.pdf [file d0cc04074f1.pdf]

## Cation- and anion-ordered rutile-type derivative $\text{LiTeO}_3(\text{OH})$ Electronic Supplementary information (ESI)

Kotaro Fujii,<sup>a</sup> Yume Yoshida,<sup>b</sup> Yue Jin Shan,<sup>b</sup> Keitaro Tezuka,<sup>b</sup> Yoshiyuki

Inaguma,<sup>c</sup> Masatomo Yashima<sup>a,\*</sup>

<sup>a</sup> Department of Chemistry, School of Science, Tokyo Institute of Technology, 2-12-1-W4-17, O-okayama, Meguro-ku, Tokyo, 152-8551, Japan

<sup>b</sup> Department of Applied Chemistry, Faculty of Engineering, Utsunomiya University, 7-1-2 Yoto, Utsunomiya, Tochigi 321-8585, Japan

<sup>c</sup> Department of Chemistry, Faculty of Science, Gakushuin University, 1-5-1 Mejiro, Toshima-ku, Tokyo 171-8588, Japan

\* Corresponding author (M. Y.): yashima@cms.titech.ac.jp

### (A) Structure map for $\text{MX}_2$ compounds

In 1981, Burdett et al. reported the structure map for  $\text{MX}_2$  compounds based on the atomic radii of  $M$  and  $X$  atoms.<sup>24</sup> Here, we revised this map using the ionic radii (Fig. S1).  $r_M$  and  $r_X$  are the ionic radii of cation  $M$  and anion  $X$ , respectively.  $\text{LiTeO}_3(\text{OH})$  exists in the region of rutile-type structure (Red cross mark in Fig. S1).

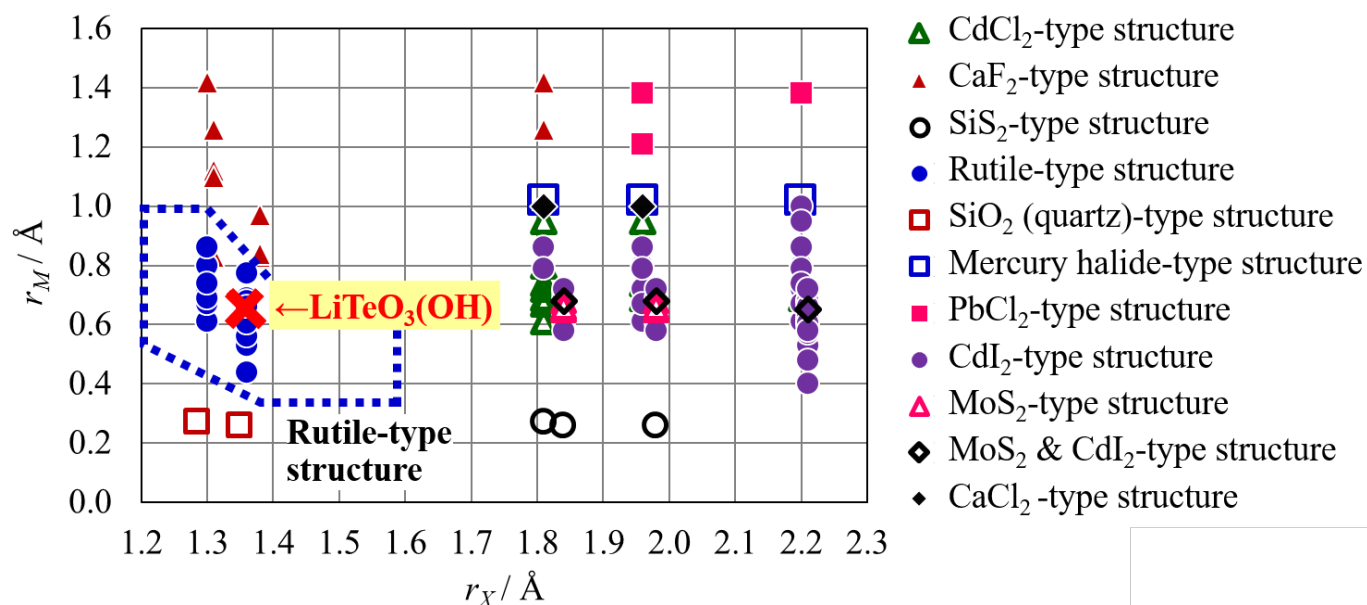

Fig. S1. Structure map for  $\text{MX}_2$  compounds.  $r_M$  and  $r_X$  are ionic radii of cation  $M$  and anion  $X$ , respectively. Ionic radii after Shannon (R. D. Shannon, Acta Crystallogr. A, 32, 751-767, 1976) were used.

## (B) Estimation of OH<sup>-</sup> content

---

OH<sup>-</sup> content in LiTeO<sub>3</sub>(OH) was estimated by the following method. 6.6% weight loss was observed for LiTeO<sub>3</sub>(OH) during the heating up to 600 °C by thermogravimetric (TG) analysis. After heating at 600 °C, LiTeO<sub>3</sub>(OH) was decomposed into Li<sub>2</sub>TeO<sub>4</sub> and TeO<sub>2</sub>, which were confirmed from X-ray powder diffraction measurements. Therefore, the following reaction occurred by heating at 600 °C,

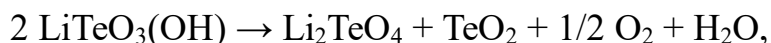

because the weight loss in this reaction 6.51% agreed well with the observed weight loss 6.6%.

## (C) SHG measurement

---

The optical second harmonic generation (SHG) response was measured for LiTeO<sub>3</sub>(OH) powders at ambient temperature using a Continuum Minilite II YAG : Nd laser ( $\lambda = 1064 \text{ nm}$ ). The details of the apparatus are described in our previous work\*. As shown in Fig. S2, SHG signal was observed.

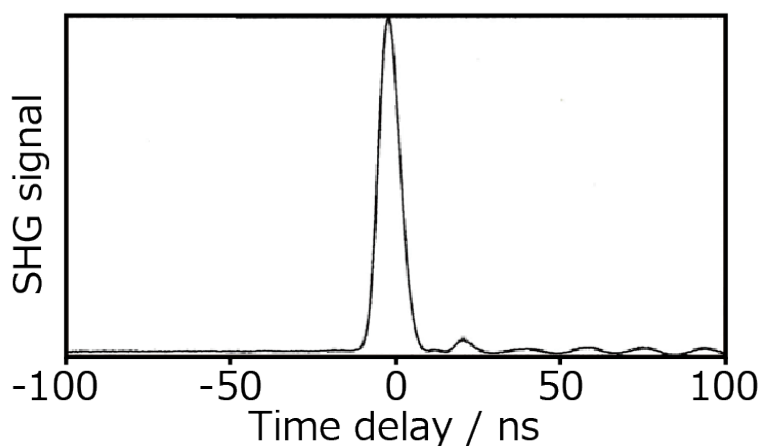

Fig. S2. Plot of SHG signal for LiTeO<sub>3</sub>(OH) measured at ambient temperature.

\* Y. Inaguma, A. Aimi, Y. Shirako, D. Sakurai, D. Mori, H. Kojitani, M. Akaogi and M. Nakayama, *J. Am. Chem. Soc.*, 2014, **136**, 2748-2756.

## (D) Refined structural parameters of LiTeO<sub>3</sub>(OH)

Table S1. Crystallographic data of LiTeO<sub>3</sub>(OH)

|                                         | ND            | LiTeO <sub>3</sub> (OH)                            | SCXRD       |
|-----------------------------------------|---------------|----------------------------------------------------|-------------|
| Chemical formula                        |               | LiTeO <sub>3</sub> (OH)                            |             |
| Temperature / °C                        | 27            |                                                    | 24          |
| <i>d</i> range / Å                      | 0.7 – 6.0     | Wavelength / Å                                     | 0.71073     |
| Space group                             |               | <i>P</i> 2 <sub>1</sub>                            |             |
| <i>a</i> / Å                            | 5.320533(3)   |                                                    | 5.3284(4)   |
| <i>b</i> / Å                            | 4.891622(2)   |                                                    | 4.8924(3)   |
| <i>c</i> / Å                            | 5.341556(2)   |                                                    | 5.3418(5)   |
| <i>α</i> / °                            | 90            |                                                    | 90          |
| <i>β</i> / °                            | 109.497811(5) |                                                    | 109.455(9)  |
| <i>γ</i> / °                            | 90            |                                                    | 90          |
| <i>V</i> / Å <sup>3</sup>               | 131.0473(4)   |                                                    | 131.303(19) |
| Calculated density / g cm <sup>-3</sup> | 5.057         |                                                    | 5.047       |
|                                         |               | Crystal size / μm                                  | 13 × 10 × 5 |
| <i>R</i> <sub>wp</sub>                  | 0.0139        | <i>R</i> <sub>int</sub>                            | 0.0427      |
| <i>R</i> <sub>p</sub>                   | 0.0119        | <i>R</i> <sub>sigma</sub>                          | 0.0479      |
| <i>R</i> <sub>B</sub>                   | 0.0325        | <i>wR</i> <sub>2</sub>                             | 0.0663      |
| <i>R</i> <sub>F</sub>                   | 0.0398        | <i>R</i> <sub>1</sub> ( <i>I</i> > 2σ( <i>I</i> )) | 0.0299      |
| Goodness of fit                         | 2.363         |                                                    | 1.117       |

The Flack parameter<sup>33</sup> was refined to be 0.44(17) for the SCXRD data using the twin matrix  $\begin{pmatrix} -1 & 0 & 0 \\ 0 & -1 & 0 \\ 0 & 0 & -1 \end{pmatrix}$ , which indicated both structures related by the inversion center exist equally in the crystal of LiTeO<sub>3</sub>(OH) (i.e. racemic twin).

Table S2. Refined structural parameters of LiTeO<sub>3</sub>(OH) using the ND data taken at 27 °C. All atoms are located at the Wyckoff general site 2*a*. Isotropic atomic displacement parameters (ADPs) were constrained to be  $U_{\text{iso}}(\text{O1}) = U_{\text{iso}}(\text{O2})$ , and  $U_{\text{iso}}(\text{O3}) = U_{\text{iso}}(\text{O4})$ , because these are related by the pseudo-inversion center.

| Site label | Atom | <i>g</i> * | <i>x</i>   | <i>y</i>    | <i>z</i>    | <i>U</i> <sub>iso</sub> **     | BVS*** |
|------------|------|------------|------------|-------------|-------------|--------------------------------|--------|
| Li         | Li   | 1          | 0.73073(2) | 0.97042(3)  | 0.48934(18) | 0.02591320(10)                 | 1.04   |
| Te         | Te   | 1          | 0.74531(6) | 0.47459(10) | -0.01025(5) | 0.0022003(2)                   | 6.00   |
| O1         | O    | 1          | 0.59455(7) | 0.1643(8)   | 0.11791(5)  | 0.005379(19)                   | 2.05   |
| O2         | O    | 1          | 0.91107(6) | 0.78974(8)  | -0.11018(5) | = <i>U</i> <sub>iso</sub> (O1) | 2.00   |
| O3         | O    | 1          | 0.64606(6) | 0.34405(7)  | -0.34382(5) | 0.0077343(2)                   | 2.11   |
| O4         | O    | 1          | 0.85143(7) | 0.60982(7)  | 0.35631(5)  | = <i>U</i> <sub>iso</sub> (O3) | 1.85   |
| H          | H    | 1          | 0.76335(6) | 0.5****     | 0.45625(5)  | 0.01952314(5)                  | 0.98   |

\* *g*: occupancy factor

\*\* *U*<sub>iso</sub>: Isotropic atomic displacement parameter

\*\*\* BVS : Bond valence sum

\*\*\*\* *y* of H atom was fixed to 0.5 because the space group is *P*2<sub>1</sub>.

Table S3. Refined structural parameters of  $\text{LiTeO}_3(\text{OH})$  using the SCXRD data taken at 24 °C.

| Site label | Atom | <i>g</i> | <i>x</i>    | <i>y</i>   | <i>z</i>    | $U_{\text{iso}}$ | BVS  |
|------------|------|----------|-------------|------------|-------------|------------------|------|
| Li         | Li   | 1        | 0.756(5)    | 0.96(3)    | 0.500(3)    | 0.019(4)         | 1.04 |
| Te         | Te   | 1        | 0.75204(14) | 0.456(4)   | 0.00683(11) | 0.00557(16)      | 5.90 |
| O1         | O    | 1        | 0.5925(16)  | 0.1435(18) | 0.1155(12)  | 0.0068(8)        | 2.02 |
| O2         | O    | 1        | 0.9081(16)  | 0.7709(18) | -0.1174(12) | 0.0068(8)        | 1.99 |
| O3         | O    | 1        | 0.6477(17)  | 0.3258(16) | -0.3471(12) | 0.0075(8)        | 1.72 |
| O4         | O    | 1        | 0.8549(15)  | 0.5922(16) | 0.3526(12)  | 0.0075(8)        | 2.19 |
| H          | H    | 1        | 0.76335     | 0.5        | 0.45625     | 0.019            | 0.98 |

### (E) Details and results of the DFT calculations

The generalized gradient approximation (GGA) electronic calculation was carried out with Vienna Ab initio Simulation Package (VASP), in order to study the optimized structure of  $\text{LiTeO}_3(\text{OH})$  using projector augmented-wave (PAW) potentials for Li, H, Te, and O atoms. A plane-wave basis set with a cutoff of 500 eV was used. The Perdew-Burke-Ernzerhof (PBE) GGA was employed for the exchange and correlation functionals. Sums over occupied electronic states were performed using the Monkhorst-Pack scheme on a  $7 \times 7 \times 7$  set of a *k*-point mesh. Unit-cell parameters and atomic coordinates were optimized with the convergence condition of 0.02 eV  $\text{\AA}^{-1}$ . The positions of all atoms were relaxed in the space group  $P2_1$ . The calculated Born effective charge tensor is shown in Table S5. The calculated band structure of  $\text{LiTeO}_3(\text{OH})$  showed the direct band gap (Fig. S3).

Table S4. Optimized structural parameters of  $\text{LiTeO}_3(\text{OH})$  by the DFT calculation. Optimized lattice parameters:  $a = 5.4008 \text{ \AA}$ ,  $b = 4.9830 \text{ \AA}$ ,  $c = 5.4074 \text{ \AA}$ ,  $\alpha = 90^\circ$ ,  $\beta = 109.38^\circ$ ,  $\gamma = 90^\circ$ ,  $V = 137.29 \text{ \AA}^3$ .

| Site label | Atom | <i>x</i> | <i>y</i> | <i>z</i> |
|------------|------|----------|----------|----------|
| Li         | Li   | 0.73734  | 0.98771  | 0.51201  |
| Te         | Te   | 0.74608  | 0.46829  | 0.98719  |
| O1         | O    | 0.59412  | 0.16207  | 0.12276  |
| O2         | O    | 0.90629  | 0.78957  | 0.88401  |
| O3         | O    | 0.64336  | 0.34264  | 0.64222  |
| O4         | O    | 0.85374  | 0.60657  | 0.34637  |
| H          | H    | 0.7656   | 0.49626  | 0.45669  |

Table S5. Calculated Born effective charge tensor for  $\text{LiTeO}_3(\text{OH})$

| $Z^*$ | $xx$   | $yy$   | $zz$   | $xy$   | $xz$   | $yx$   | $yz$   | $zx$   | $zy$   |
|-------|--------|--------|--------|--------|--------|--------|--------|--------|--------|
| Te    | 6.179  | 5.704  | 4.037  | 0.838  | -0.222 | -0.850 | -1.375 | 0.031  | 0.244  |
| Li    | 1.028  | 1.225  | 1.376  | -0.082 | 0.113  | -0.249 | -0.096 | 0.144  | 0.215  |
| O1    | -2.392 | -2.207 | -1.369 | -1.023 | 0.031  | -0.999 | 0.119  | 0.030  | 0.157  |
| O2    | -2.426 | -2.241 | -1.268 | -1.014 | -0.163 | -0.983 | 0.047  | -0.142 | 0.064  |
| O3    | -1.675 | -1.563 | -2.109 | -0.061 | 0.353  | 0.140  | 0.075  | 0.385  | 0.037  |
| O4    | -1.612 | -1.359 | -2.030 | -0.213 | 0.380  | 0.087  | -0.043 | 0.590  | 0.250  |
| H     | 0.898  | 0.441  | 1.363  | 0.522  | -0.492 | 0.102  | -0.102 | -1.038 | -0.843 |

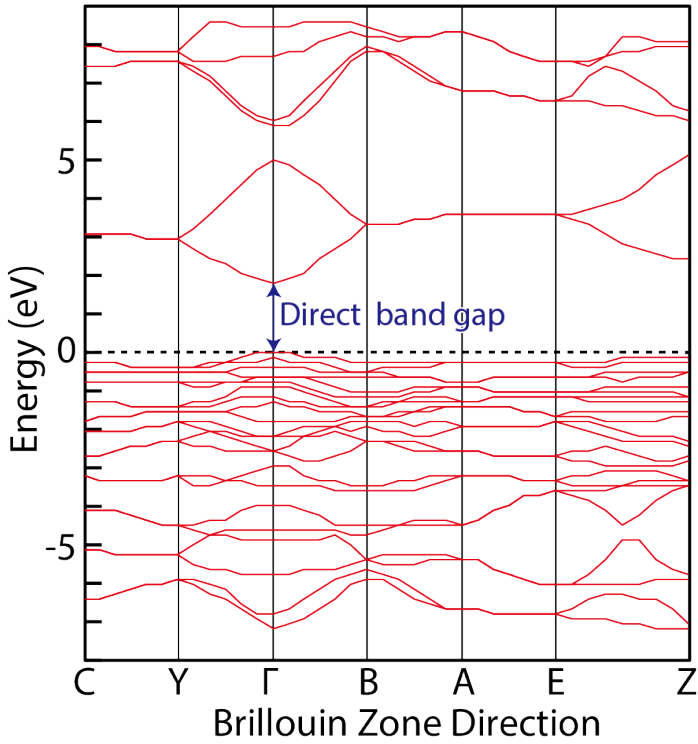

Fig. S3. Calculated band structure of  $\text{LiTeO}_3(\text{OH})$ .

## (F) Comparison of the distortion parameters

The polarization value of  $\text{LiTeO}_3(\text{OH})$  is calculated to be  $1.36(15) \mu\text{C cm}^{-2}$  along the  $b$  axis. Contributions of  $\text{Li}^+$ ,  $\text{Te}^{6+}$ , and  $\text{H}^+$  cations to the polarization value are  $0.96$ ,  $-1.21$ , and  $1.62 \mu\text{C cm}^{-2}$ , respectively (average position of four oxygen atoms were set to the origin in this calculation). It is known that displacements of cation  $M$  ( $M = \text{Ti}$  or  $\text{Nb}$ ) from the center of  $\text{MO}_6$  octahedra are important for large polarizations for some materials such as  $\text{LiNbO}_3$ -type  $\text{ZnTiO}_3$  and  $\text{LiNbO}_3$ .<sup>27</sup> In the present case, however, the distortion of  $\text{LiO}_4(\text{OH})_2$  and  $\text{TeO}_5\text{OH}$

octahedra are smaller than those of  $\text{TiO}_6$  and  $\text{NbO}_6$  in  $\text{LiNbO}_3$ -type  $\text{ZnTiO}_3$  and  $\text{LiNbO}_3$ , respectively. Degrees of distortions of  $\text{MO}_6$  octahedra were calculated using following octahedral distortion parameter  $\Delta$ .\*\*

$$\Delta = \frac{1}{6} \sum_{i=1}^6 \left\{ \frac{(d_i - d_{\text{ave}})}{d_{\text{ave}}} \right\}^2$$

Here,  $d_i$  is the atomic distance of  $M\text{-O}$ , and  $d_{\text{ave}}$  is the average of six  $d_i$ .  $\Delta$  of  $\text{LiO}_4(\text{OH})_2$  and  $\text{TeO}_5\text{OH}$  octahedra are calculated to be  $13 \times 10^{-4}$ , and  $8 \times 10^{-4}$ , respectively. These are smaller than those of  $\text{TiO}_6$  octahedra ( $\Delta = 47 \times 10^{-4}$ ) in  $\text{LiNbO}_3$ -type  $\text{ZnTiO}_3$ , and  $\text{NbO}_6$  octahedra ( $\Delta = 40 \times 10^{-4}$ ) in  $\text{LiNbO}_3$ -type  $\text{LiNbO}_3$ , which are known to have polar structures by the second-order Jahn-Teller effect.<sup>27</sup>

\* Y. Inaguma, A. Aimi, Y. Shirako, D. Sakurai, D. Mori, H. Kojitani, M. Akaogi and M. Nakayama, *J. Am. Chem. Soc.*, 2014, **136**, 2748-2756.

\*\* I. D. Brown, R. D. Shannon, *Acta Crystallogr., Sect. A* 1973, **29**, 266-282.

## **(G) Results of the BVE calculations for $\text{Li}^+$ , $\text{H}^+$ , and $\text{O}^{2-}$**

In order to investigate the possibility of  $\text{LiTeO}_3(\text{OH})$  as an ionic conductor, the BVE calculations were performed using the refined crystal structure from the neutron diffraction data of  $\text{LiTeO}_3(\text{OH})$ . Table S6 summarized the BVE barriers for the  $\text{Li}^+$ ,  $\text{H}^+$ , and  $\text{O}^{2-}$  migrations along the  $a$ ,  $b$  and  $c$  axes. The BVE barrier for  $\text{Li}^+$  migration is significantly larger than the others. Therefore,  $\text{LiTeO}_3(\text{OH})$  is not good candidate for the  $\text{Li}^+$  conductor. The high BVE barrier for  $\text{Li}^+$  migration is ascribed to the small bottleneck size of the  $\text{Li}^+$  migration path. As shown in Fig. S4, the bottleneck of  $\text{Li}^+$  migration along the  $b$  axis is at the center of the O1-O3-O3 triangle (sky-blue triangle). The critical radius of the O1-O3-O3 triangle is 0.26 Å, which is significantly smaller than the ionic radius of  $\text{Li}^+$  (0.76 Å for CN = 6). Therefore,  $\text{Li}^+$  is difficult to migrate in the crystal structure of  $\text{LiTeO}_3(\text{OH})$ . The BVE barrier for the  $\text{H}^+$

migration along the  $b$  axis (0.38 eV) is lower than those of along the  $a$  and  $c$  axes, suggesting one dimensional proton conduction would occur in  $\text{LiTeO}_3(\text{OH})$ . The BVE barriers for the  $\text{O}^{2-}$  migration along the  $a$ ,  $b$ , and  $c$  axes are comparable and range from 0.79 to 1.01 eV. Thus,  $\text{LiTeO}_3(\text{OH})$  is also a good candidate for oxide-ion conductor, with three dimensional oxide-ion migration path.

Table S6. BVE barriers for the  $\text{Li}^+$ ,  $\text{H}^+$ , and  $\text{O}^{2-}$  migrations along the  $a$ ,  $b$  and  $c$  axes

|                 | $a$ axis<br>(eV) | $b$ axis<br>(eV) | $c$ axis<br>(eV) |
|-----------------|------------------|------------------|------------------|
| $\text{Li}^+$   | 3.05             | 2.80             | 5.60             |
| $\text{H}^+$    | 0.69             | 0.38             | 0.64             |
| $\text{O}^{2-}$ | 1.01             | 0.79             | 0.84             |

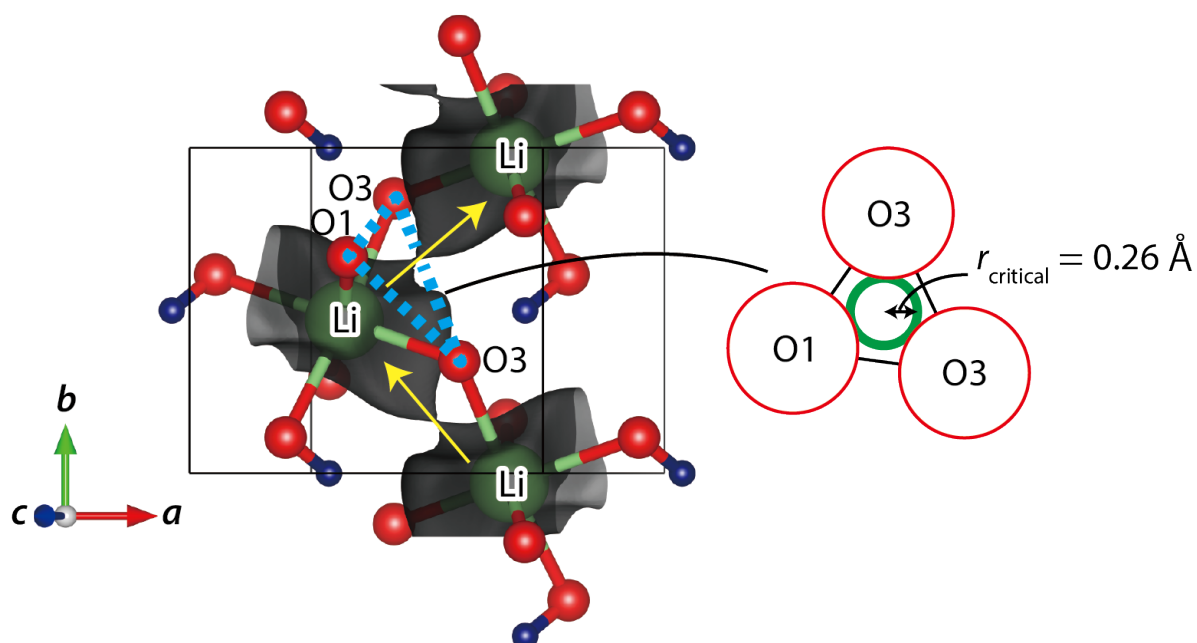

Fig. S4. Bond-valence-based energy (BVE) landscape for a  $\text{Li}^+$  in  $\text{LiTeO}_3(\text{OH})$  with black isosurfaces at 2.8 eV. Yellow arrows indicate the possible  $\text{Li}^+$  migration path along the  $b$ -axis. Light-blue triangle represents the bottleneck for the  $\text{Li}^+$  migration.
